# Supplementary material
Source: publisher figshare collection journal article supplement (https://acs.figshare.com/ndownloader/files/4721785)
Supplement: Supplementary file 1 [file 4721785]

 
data_[UO2(salophen)]2-0.5CH2Cl2-Complex_3-0.5CH2Cl2 
 
_audit_creation_method            SHELXL-97 
_chemical_name_systematic 
; 
 ? 
; 
_chemical_name_common             ? 
_chemical_melting_point           ? 
_chemical_formula_moiety          '2(C40 H28 N4 O8 U2), C H2 Cl2' 
_chemical_formula_sum 
 'C40.50 H29 Cl N4 O8 U2' 
_chemical_formula_weight          1211.19 
 
loop_ 
 _atom_type_symbol 
 _atom_type_description 
 _atom_type_scat_dispersion_real 
 _atom_type_scat_dispersion_imag 
 _atom_type_scat_source 
 'C'  'C'   0.0033   0.0016 
 'International Tables Vol C Tables 4.2.6.8 and 6.1.1.4' 
 'H'  'H'   0.0000   0.0000 
 'International Tables Vol C Tables 4.2.6.8 and 6.1.1.4' 
 'Cl'  'Cl'   0.1484   0.1585 
 'International Tables Vol C Tables 4.2.6.8 and 6.1.1.4' 
 'N'  'N'   0.0061   0.0033 
 'International Tables Vol C Tables 4.2.6.8 and 6.1.1.4' 
 'O'  'O'   0.0106   0.0060 
 'International Tables Vol C Tables 4.2.6.8 and 6.1.1.4' 
 'U'  'U'  -9.6767   9.6646 
 'International Tables Vol C Tables 4.2.6.8 and 6.1.1.4' 
 
_symmetry_cell_setting             triclinic
_symmetry_space_group_name_H-M    'P -1'
 
loop_ 
 _symmetry_equiv_pos_as_xyz 
 'x, y, z' 
 '-x, -y, -z' 
 
_cell_length_a                    15.717(5) 
_cell_length_b                    15.993(7) 
_cell_length_c                    17.619(5) 
_cell_angle_alpha                 67.45(3) 
_cell_angle_beta                  77.99(3) 
_cell_angle_gamma                 81.66(3) 
_cell_volume                      3990(2) 
_cell_formula_units_Z             4 
_cell_measurement_temperature     93(2) 
_cell_measurement_reflns_used     35412
_cell_measurement_theta_min       3.0
_cell_measurement_theta_max       27.5
 
_exptl_crystal_description       'block'
_exptl_crystal_colour            'red'
_exptl_crystal_size_max           0.16 
_exptl_crystal_size_mid           0.11 
_exptl_crystal_size_min           0.06 
_exptl_crystal_density_meas       ? 
_exptl_crystal_density_diffrn     2.016 
_exptl_crystal_density_method     'not measured' 
_exptl_crystal_F_000              2260 
_exptl_absorpt_coefficient_mu     8.230 
_exptl_absorpt_correction_type    numerical
_exptl_absorpt_correction_T_min   0.3526 
_exptl_absorpt_correction_T_max   0.6380 
_exptl_absorpt_process_details         
;
    Higashi, T. (1995). Program for Absorption Correction.
    Rigaku Corporation, Tokyo, Japan.
;
 
_diffrn_ambient_temperature       93(2) 
_diffrn_radiation_wavelength      0.71075 
_diffrn_radiation_type            MoK\a 
_diffrn_radiation_source          'fine-focus sealed tube' 
_diffrn_radiation_monochromator   graphite 
_diffrn_measurement_device_type  'Rigaku RAXIS-RAPID'
_diffrn_measurement_method        \w
_diffrn_detector_area_resol_mean  10.00
_diffrn_reflns_number             37695 
_diffrn_reflns_av_R_equivalents   0.0695 
_diffrn_reflns_av_sigmaI/netI     0.0811 
_diffrn_reflns_limit_h_min        -20 
_diffrn_reflns_limit_h_max        18 
_diffrn_reflns_limit_k_min        -20 
_diffrn_reflns_limit_k_max        20 
_diffrn_reflns_limit_l_min        -22 
_diffrn_reflns_limit_l_max        22 
_diffrn_reflns_theta_min          3.01 
_diffrn_reflns_theta_max          27.48 
_reflns_number_total              17850 
_reflns_number_gt                 12487 
_reflns_threshold_expression      >2sigma(I) 
 
_computing_data_collection        'PROCESS-AUTO'
_computing_cell_refinement        'PROCESS-AUTO'
_computing_data_reduction         'CrystalStructure'
_computing_structure_solution     'DIRDIF99 (PATTY)'
_computing_structure_refinement   'SHELXL-97 (Sheldrick, 1997)' 
_computing_molecular_graphics     ? 
_computing_publication_material   ? 
 
_refine_special_details 
; 
 Refinement of F^2^ against ALL reflections.  The weighted R-factor wR and 
 goodness of fit S are based on F^2^, conventional R-factors R are based 
 on F, with F set to zero for negative F^2^. The threshold expression of 
 F^2^ > 2sigma(F^2^) is used only for calculating R-factors(gt) etc. and is 
 not relevant to the choice of reflections for refinement.  R-factors based 
 on F^2^ are statistically about twice as large as those based on F, and R- 
 factors based on ALL data will be even larger. 
; 
 
_refine_ls_structure_factor_coef  Fsqd  
_refine_ls_matrix_type            full 
_refine_ls_weighting_scheme       calc  
_refine_ls_weighting_details 
 'calc w=1/[\s^2^(Fo^2^)+(0.0396P)^2^+60.3343P] where P=(Fo^2^+2Fc^2^)/3' 
_atom_sites_solution_primary      direct 
_atom_sites_solution_secondary    difmap 
_atom_sites_solution_hydrogens    geom 
_refine_ls_hydrogen_treatment     constr 
_refine_ls_extinction_method      none 
_refine_ls_extinction_coef        ? 
_refine_ls_number_reflns          17850 
_refine_ls_number_parameters      1001 
_refine_ls_number_restraints      0 
_refine_ls_R_factor_all           0.0978 
_refine_ls_R_factor_gt            0.0594 
_refine_ls_wR_factor_ref          0.1297 
_refine_ls_wR_factor_gt           0.1161 
_refine_ls_goodness_of_fit_ref    1.031 
_refine_ls_restrained_S_all       1.031 
_refine_ls_shift/su_max           0.002 
_refine_ls_shift/su_mean          0.000 
 
loop_ 
 _atom_site_label 
 _atom_site_type_symbol 
 _atom_site_fract_x 
 _atom_site_fract_y 
 _atom_site_fract_z 
 _atom_site_U_iso_or_equiv 
 _atom_site_adp_type 
 _atom_site_occupancy 
 _atom_site_symmetry_multiplicity 
 _atom_site_calc_flag 
 _atom_site_refinement_flags 
 _atom_site_disorder_assembly 
 _atom_site_disorder_group 
U1 U 0.21155(3) 0.32362(3) 0.45371(2) 0.02468(10) Uani 1 1 d . . . 
U2 U 0.25921(3) 0.06733(3) 0.49028(2) 0.02631(10) Uani 1 1 d . . . 
U3 U 0.92726(3) 0.80556(3) -0.03910(2) 0.02528(10) Uani 1 1 d . . . 
U4 U 0.69478(3) 0.76228(3) 0.08847(2) 0.02426(10) Uani 1 1 d . . . 
Cl1 Cl 0.6139(5) 0.4816(5) 0.4182(5) 0.133(2) Uani 1 1 d . . . 
Cl2 Cl 0.6739(4) 0.3577(4) 0.5695(4) 0.1093(19) Uani 1 1 d . . . 
O1 O 0.3146(5) 0.3708(5) 0.4166(4) 0.0295(17) Uani 1 1 d . . . 
O2 O 0.1074(5) 0.2803(5) 0.4977(5) 0.0314(17) Uani 1 1 d . . . 
O3 O 0.2876(5) 0.1883(5) 0.5357(4) 0.0252(16) Uani 1 1 d . . . 
O4 O 0.1663(5) 0.4138(5) 0.3357(4) 0.0331(18) Uani 1 1 d . . . 
O5 O 0.3684(5) 0.0555(5) 0.4424(4) 0.0310(17) Uani 1 1 d . . . 
O6 O 0.1480(5) 0.0747(5) 0.5339(5) 0.0331(18) Uani 1 1 d . . . 
O7 O 0.2451(5) 0.2139(5) 0.3823(4) 0.0279(17) Uani 1 1 d . . . 
O8 O 0.2897(5) -0.0242(5) 0.6158(5) 0.0335(18) Uani 1 1 d . . . 
O9 O 0.9974(4) 0.7198(5) 0.0215(5) 0.0284(16) Uani 1 1 d . . . 
O10 O 0.8605(5) 0.8885(5) -0.1057(4) 0.0280(16) Uani 1 1 d . . . 
O11 O 1.0091(5) 0.9067(5) -0.0395(5) 0.0309(17) Uani 1 1 d . . . 
O12 O 0.8207(5) 0.6949(5) 0.0187(4) 0.0238(15) Uani 1 1 d . . . 
O13 O 0.7076(4) 0.6888(5) 0.1917(4) 0.0251(16) Uani 1 1 d . . . 
O14 O 0.6779(4) 0.8406(5) -0.0114(4) 0.0264(16) Uani 1 1 d . . . 
O15 O 0.6269(5) 0.6565(5) 0.0767(4) 0.0331(18) Uani 1 1 d . . . 
O16 O 0.8235(4) 0.8309(5) 0.0795(4) 0.0257(16) Uani 1 1 d . . . 
N1 N 0.2194(6) 0.3410(6) 0.5875(6) 0.029(2) Uani 1 1 d . . . 
N2 N 0.1487(6) 0.4743(6) 0.4665(5) 0.031(2) Uani 1 1 d . . . 
N3 N 0.2131(7) 0.0426(7) 0.3710(7) 0.039(2) Uani 1 1 d . . . 
N4 N 0.2573(6) -0.0964(7) 0.5048(6) 0.037(2) Uani 1 1 d . . . 
N5 N 0.9384(5) 0.7167(6) -0.1337(5) 0.0237(19) Uani 1 1 d . . . 
N6 N 1.0515(6) 0.8345(6) -0.1614(6) 0.029(2) Uani 1 1 d . . . 
N7 N 0.5338(6) 0.7785(6) 0.1441(5) 0.027(2) Uani 1 1 d . . . 
N8 N 0.6472(6) 0.8882(6) 0.1448(5) 0.0257(19) Uani 1 1 d . . . 
C1 C 0.3576(7) 0.1876(7) 0.5702(6) 0.029(2) Uani 1 1 d . . . 
C2 C 0.4293(7) 0.1262(7) 0.5674(6) 0.027(2) Uani 1 1 d . . . 
H2 H 0.4302 0.0856 0.5395 0.033 Uiso 1 1 calc R . . 
C3 C 0.4996(8) 0.1234(8) 0.6048(7) 0.034(3) Uani 1 1 d . . . 
H3 H 0.5477 0.0807 0.6024 0.041 Uiso 1 1 calc R . . 
C4 C 0.5010(7) 0.1828(8) 0.6465(6) 0.028(2) Uani 1 1 d . . . 
H4 H 0.5499 0.1819 0.6706 0.034 Uiso 1 1 calc R . . 
C5 C 0.4285(7) 0.2424(8) 0.6509(7) 0.030(2) Uani 1 1 d . . . 
H5 H 0.4276 0.2818 0.6800 0.036 Uiso 1 1 calc R . . 
C6 C 0.3564(7) 0.2464(8) 0.6137(7) 0.031(2) Uani 1 1 d . . . 
C7 C 0.2852(7) 0.3108(7) 0.6271(6) 0.027(2) Uani 1 1 d . . . 
H7 H 0.2870 0.3333 0.6693 0.033 Uiso 1 1 calc R . . 
C8 C 0.1555(7) 0.4031(7) 0.6134(6) 0.027(2) Uani 1 1 d . . . 
C9 C 0.1316(8) 0.3958(9) 0.6952(8) 0.039(3) Uani 1 1 d . . . 
H9 H 0.1563 0.3474 0.7378 0.047 Uiso 1 1 calc R . . 
C10 C 0.0717(8) 0.4593(9) 0.7148(8) 0.042(3) Uani 1 1 d . . . 
H10 H 0.0554 0.4548 0.7712 0.051 Uiso 1 1 calc R . . 
C11 C 0.0343(8) 0.5307(9) 0.6522(8) 0.043(3) Uani 1 1 d . . . 
H11 H -0.0056 0.5754 0.6659 0.052 Uiso 1 1 calc R . . 
C12 C 0.0558(8) 0.5355(8) 0.5712(7) 0.035(3) Uani 1 1 d . . . 
H12 H 0.0280 0.5817 0.5294 0.042 Uiso 1 1 calc R . . 
C13 C 0.1194(8) 0.4721(8) 0.5493(7) 0.034(3) Uani 1 1 d . . . 
C14 C 0.1500(8) 0.5524(8) 0.4060(8) 0.038(3) Uani 1 1 d . . . 
H14 H 0.1378 0.6043 0.4213 0.045 Uiso 1 1 calc R . . 
C15 C 0.1679(8) 0.5696(8) 0.3178(7) 0.038(3) Uani 1 1 d . . . 
C16 C 0.1743(10) 0.6597(9) 0.2640(8) 0.052(4) Uani 1 1 d . . . 
H16 H 0.1712 0.7062 0.2858 0.062 Uiso 1 1 calc R . . 
C17 C 0.1853(11) 0.6813(11) 0.1788(9) 0.065(4) Uani 1 1 d . . . 
H17 H 0.1899 0.7428 0.1422 0.078 Uiso 1 1 calc R . . 
C18 C 0.1897(10) 0.6147(10) 0.1468(8) 0.057(4) Uani 1 1 d . . . 
H18 H 0.1956 0.6305 0.0883 0.068 Uiso 1 1 calc R . . 
C19 C 0.1856(9) 0.5240(9) 0.1993(7) 0.045(3) Uani 1 1 d . . . 
H19 H 0.1909 0.4785 0.1761 0.054 Uiso 1 1 calc R . . 
C20 C 0.1739(8) 0.4991(8) 0.2853(7) 0.035(3) Uani 1 1 d . . . 
C21 C 0.2750(7) 0.2357(8) 0.3002(6) 0.030(3) Uani 1 1 d . . . 
C22 C 0.3155(7) 0.3167(9) 0.2548(7) 0.036(3) Uani 1 1 d . . . 
H22 H 0.3252 0.3532 0.2835 0.044 Uiso 1 1 calc R . . 
C23 C 0.3417(8) 0.3454(10) 0.1690(7) 0.043(3) Uani 1 1 d . . . 
H23 H 0.3704 0.4000 0.1400 0.052 Uiso 1 1 calc R . . 
C24 C 0.3261(9) 0.2946(12) 0.1261(8) 0.055(4) Uani 1 1 d . . . 
H24 H 0.3427 0.3147 0.0672 0.066 Uiso 1 1 calc R . . 
C25 C 0.2867(8) 0.2152(10) 0.1686(8) 0.044(4) Uani 1 1 d . . . 
H25 H 0.2749 0.1812 0.1384 0.052 Uiso 1 1 calc R . . 
C26 C 0.2627(8) 0.1817(10) 0.2573(8) 0.043(3) Uani 1 1 d . . . 
C27 C 0.2264(9) 0.0954(11) 0.2931(9) 0.050(4) Uani 1 1 d . . . 
H27 H 0.2099 0.0741 0.2552 0.060 Uiso 1 1 calc R . . 
C28 C 0.1757(8) -0.0420(10) 0.3928(9) 0.048(3) Uani 1 1 d . . . 
C29 C 0.1164(10) -0.0537(11) 0.3496(11) 0.063(5) Uani 1 1 d . . . 
H29 H 0.0993 -0.0047 0.3028 0.075 Uiso 1 1 calc R . . 
C30 C 0.0819(10) -0.1386(12) 0.3760(13) 0.076(6) Uani 1 1 d . . . 
H30 H 0.0415 -0.1468 0.3465 0.091 Uiso 1 1 calc R . . 
C31 C 0.1059(9) -0.2099(12) 0.4437(12) 0.069(5) Uani 1 1 d . . . 
H31 H 0.0819 -0.2668 0.4611 0.083 Uiso 1 1 calc R . . 
C32 C 0.1649(8) -0.1987(9) 0.4863(10) 0.050(4) Uani 1 1 d . . . 
H32 H 0.1814 -0.2477 0.5334 0.060 Uiso 1 1 calc R . . 
C33 C 0.2009(7) -0.1140(9) 0.4597(9) 0.041(3) Uani 1 1 d . . . 
C34 C 0.3101(8) -0.1609(9) 0.5432(8) 0.041(3) Uani 1 1 d . . . 
H34 H 0.3111 -0.2172 0.5364 0.049 Uiso 1 1 calc R . . 
C35 C 0.3676(8) -0.1568(7) 0.5953(7) 0.035(3) Uani 1 1 d . . . 
C36 C 0.4381(8) -0.2216(8) 0.6125(8) 0.039(3) Uani 1 1 d . . . 
H36 H 0.4469 -0.2674 0.5892 0.047 Uiso 1 1 calc R . . 
C37 C 0.4951(8) -0.2213(9) 0.6620(8) 0.043(3) Uani 1 1 d . . . 
H37 H 0.5446 -0.2636 0.6699 0.052 Uiso 1 1 calc R . . 
C38 C 0.4785(8) -0.1584(8) 0.7000(8) 0.039(3) Uani 1 1 d . . . 
H38 H 0.5157 -0.1594 0.7365 0.047 Uiso 1 1 calc R . . 
C39 C 0.4097(8) -0.0947(8) 0.6864(7) 0.040(3) Uani 1 1 d . . . 
H39 H 0.3995 -0.0532 0.7146 0.048 Uiso 1 1 calc R . . 
C40 C 0.3537(7) -0.0890(7) 0.6319(6) 0.029(2) Uani 1 1 d . . . 
C41 C 0.8401(7) 0.6055(8) 0.0349(7) 0.030(2) Uani 1 1 d . . . 
C42 C 0.8141(8) 0.5404(8) 0.1144(7) 0.037(3) Uani 1 1 d . . . 
H42 H 0.7853 0.5598 0.1585 0.044 Uiso 1 1 calc R . . 
C43 C 0.8301(8) 0.4487(8) 0.1290(8) 0.041(3) Uani 1 1 d . . . 
H43 H 0.8131 0.4060 0.1835 0.049 Uiso 1 1 calc R . . 
C44 C 0.8711(8) 0.4171(8) 0.0650(7) 0.037(3) Uani 1 1 d . . . 
H44 H 0.8802 0.3540 0.0751 0.045 Uiso 1 1 calc R . . 
C45 C 0.8975(7) 0.4801(7) -0.0121(7) 0.029(2) Uani 1 1 d . . . 
H45 H 0.9261 0.4595 -0.0555 0.035 Uiso 1 1 calc R . . 
C46 C 0.8842(7) 0.5733(8) -0.0298(7) 0.029(2) Uani 1 1 d . . . 
C47 C 0.9208(7) 0.6332(8) -0.1122(6) 0.028(2) Uani 1 1 d . . . 
H47 H 0.9331 0.6087 -0.1550 0.034 Uiso 1 1 calc R . . 
C48 C 0.9714(7) 0.7652(7) -0.2198(6) 0.025(2) Uani 1 1 d . . . 
C49 C 0.9451(7) 0.7558(8) -0.2861(6) 0.032(3) Uani 1 1 d . . . 
H49 H 0.9058 0.7118 -0.2770 0.038 Uiso 1 1 calc R . . 
C50 C 0.9780(8) 0.8131(9) -0.3673(7) 0.038(3) Uani 1 1 d . . . 
H50 H 0.9610 0.8068 -0.4134 0.046 Uiso 1 1 calc R . . 
C51 C 1.0343(8) 0.8783(9) -0.3819(7) 0.042(3) Uani 1 1 d . . . 
H51 H 1.0535 0.9186 -0.4370 0.051 Uiso 1 1 calc R . . 
C52 C 1.0621(8) 0.8832(8) -0.3142(7) 0.036(3) Uani 1 1 d . . . 
H52 H 1.1034 0.9253 -0.3233 0.043 Uiso 1 1 calc R . . 
C53 C 1.0308(7) 0.8281(7) -0.2334(6) 0.027(2) Uani 1 1 d . . . 
C54 C 1.1314(7) 0.8527(8) -0.1615(7) 0.037(3) Uani 1 1 d . . . 
H54 H 1.1751 0.8545 -0.2082 0.045 Uiso 1 1 calc R . . 
C55 C 1.1549(7) 0.8698(8) -0.0946(7) 0.034(3) Uani 1 1 d . . . 
C56 C 1.2446(8) 0.8639(8) -0.0898(8) 0.042(3) Uani 1 1 d . . . 
H56 H 1.2865 0.8444 -0.1281 0.051 Uiso 1 1 calc R . . 
C57 C 1.2728(8) 0.8858(9) -0.0305(8) 0.042(3) Uani 1 1 d . . . 
H57 H 1.3326 0.8766 -0.0250 0.051 Uiso 1 1 calc R . . 
C58 C 1.2125(8) 0.9211(8) 0.0200(7) 0.036(3) Uani 1 1 d . . . 
H58 H 1.2319 0.9408 0.0576 0.043 Uiso 1 1 calc R . . 
C59 C 1.1253(7) 0.9288(8) 0.0176(7) 0.031(2) Uani 1 1 d . . . 
H59 H 1.0854 0.9532 0.0537 0.037 Uiso 1 1 calc R . . 
C60 C 1.0940(8) 0.9011(7) -0.0372(7) 0.031(3) Uani 1 1 d . . . 
C61 C 0.5762(7) 0.5945(7) 0.1339(7) 0.029(2) Uani 1 1 d . . . 
C62 C 0.5917(9) 0.5032(9) 0.1401(8) 0.042(3) Uani 1 1 d . . . 
H62 H 0.6371 0.4867 0.1024 0.050 Uiso 1 1 calc R . . 
C63 C 0.5408(9) 0.4378(9) 0.2009(8) 0.048(3) Uani 1 1 d . . . 
H63 H 0.5515 0.3765 0.2045 0.057 Uiso 1 1 calc R . . 
C64 C 0.4737(10) 0.4606(9) 0.2572(10) 0.056(4) Uani 1 1 d . . . 
H64 H 0.4407 0.4148 0.3003 0.067 Uiso 1 1 calc R . . 
C65 C 0.4562(9) 0.5502(9) 0.2495(8) 0.049(3) Uani 1 1 d . . . 
H65 H 0.4081 0.5662 0.2853 0.059 Uiso 1 1 calc R . . 
C66 C 0.5083(7) 0.6192(8) 0.1894(7) 0.032(3) Uani 1 1 d . . . 
C67 C 0.4850(7) 0.7111(8) 0.1844(7) 0.034(3) Uani 1 1 d . . . 
H67 H 0.4293 0.7236 0.2129 0.040 Uiso 1 1 calc R . . 
C68 C 0.4993(7) 0.8664(8) 0.1427(6) 0.029(2) Uani 1 1 d . . . 
C69 C 0.4119(7) 0.8962(9) 0.1406(7) 0.038(3) Uani 1 1 d . . . 
H69 H 0.3724 0.8584 0.1375 0.046 Uiso 1 1 calc R . . 
C70 C 0.3827(7) 0.9810(9) 0.1430(7) 0.039(3) Uani 1 1 d . . . 
H70 H 0.3227 1.0008 0.1438 0.046 Uiso 1 1 calc R . . 
C71 C 0.4413(8) 1.0370(8) 0.1443(8) 0.040(3) Uani 1 1 d . . . 
H71 H 0.4212 1.0960 0.1442 0.047 Uiso 1 1 calc R . . 
C72 C 0.5289(8) 1.0084(8) 0.1457(7) 0.033(3) Uani 1 1 d . . . 
H72 H 0.5682 1.0469 0.1478 0.040 Uiso 1 1 calc R . . 
C73 C 0.5585(7) 0.9226(7) 0.1438(6) 0.029(2) Uani 1 1 d . . . 
C74 C 0.6926(7) 0.9118(7) 0.1846(6) 0.027(2) Uani 1 1 d . . . 
H74 H 0.6631 0.9510 0.2123 0.033 Uiso 1 1 calc R . . 
C75 C 0.7825(6) 0.8865(7) 0.1924(6) 0.024(2) Uani 1 1 d . . . 
C76 C 0.8101(8) 0.9049(8) 0.2557(7) 0.035(3) Uani 1 1 d . . . 
H76 H 0.7697 0.9342 0.2875 0.042 Uiso 1 1 calc R . . 
C77 C 0.8939(8) 0.8814(12) 0.2725(8) 0.053(4) Uani 1 1 d . . . 
H77 H 0.9111 0.8928 0.3160 0.064 Uiso 1 1 calc R . . 
C78 C 0.9523(8) 0.8409(12) 0.2244(9) 0.058(5) Uani 1 1 d . . . 
H78 H 1.0102 0.8244 0.2358 0.070 Uiso 1 1 calc R . . 
C79 C 0.9305(8) 0.8234(9) 0.1609(7) 0.037(3) Uani 1 1 d . . . 
H79 H 0.9727 0.7955 0.1292 0.045 Uiso 1 1 calc R . . 
C80 C 0.8468(7) 0.8464(8) 0.1432(6) 0.028(2) Uani 1 1 d . . . 
C81 C 0.6266(17) 0.4636(16) 0.5177(16) 0.118(9) Uani 1 1 d . . . 
H81A H 0.5686 0.4716 0.5502 0.141 Uiso 1 1 calc R . . 
H81B H 0.6630 0.5103 0.5156 0.141 Uiso 1 1 calc R . . 
 
loop_ 
 _atom_site_aniso_label 
 _atom_site_aniso_U_11 
 _atom_site_aniso_U_22 
 _atom_site_aniso_U_33 
 _atom_site_aniso_U_23 
 _atom_site_aniso_U_13 
 _atom_site_aniso_U_12 
U1 0.0282(2) 0.0230(2) 0.02132(19) -0.00611(16) -0.00871(16) 0.00384(16) 
U2 0.0275(2) 0.0255(2) 0.0271(2) -0.01133(17) -0.00740(16) 0.00352(16) 
U3 0.0271(2) 0.0229(2) 0.0251(2) -0.00895(16) -0.00523(16) 0.00230(16) 
U4 0.0272(2) 0.0243(2) 0.01979(18) -0.00665(16) -0.00649(15) 0.00257(16) 
Cl1 0.155(6) 0.118(6) 0.129(6) -0.041(5) -0.034(5) -0.020(5) 
Cl2 0.111(4) 0.085(4) 0.141(5) -0.055(4) -0.018(4) -0.002(3) 
O1 0.027(4) 0.036(4) 0.024(4) -0.009(3) -0.009(3) 0.006(3) 
O2 0.027(4) 0.031(4) 0.035(4) -0.013(4) -0.008(3) 0.008(3) 
O3 0.029(4) 0.025(4) 0.017(3) -0.005(3) -0.008(3) 0.007(3) 
O4 0.045(5) 0.029(4) 0.023(4) -0.006(3) -0.010(3) 0.001(4) 
O5 0.041(5) 0.032(4) 0.025(4) -0.015(3) -0.013(3) 0.002(4) 
O6 0.045(5) 0.026(4) 0.038(4) -0.018(4) -0.017(4) 0.003(4) 
O7 0.038(4) 0.029(4) 0.021(4) -0.017(3) -0.007(3) 0.009(3) 
O8 0.037(4) 0.029(4) 0.028(4) -0.007(3) -0.007(3) 0.010(3) 
O9 0.021(4) 0.028(4) 0.036(4) -0.012(3) -0.005(3) 0.001(3) 
O10 0.024(4) 0.030(4) 0.030(4) -0.012(3) -0.002(3) -0.002(3) 
O11 0.031(4) 0.024(4) 0.040(4) -0.015(3) -0.009(3) 0.005(3) 
O12 0.031(4) 0.019(4) 0.022(3) -0.012(3) 0.002(3) 0.001(3) 
O13 0.026(4) 0.028(4) 0.019(3) -0.008(3) -0.005(3) 0.005(3) 
O14 0.025(4) 0.029(4) 0.022(4) -0.010(3) -0.001(3) 0.005(3) 
O15 0.046(5) 0.025(4) 0.026(4) -0.007(3) -0.008(4) 0.003(4) 
O16 0.022(4) 0.030(4) 0.024(4) -0.010(3) 0.000(3) -0.002(3) 
N1 0.030(5) 0.025(5) 0.032(5) -0.012(4) -0.009(4) 0.007(4) 
N2 0.040(5) 0.025(5) 0.029(5) -0.010(4) -0.014(4) 0.004(4) 
N3 0.038(6) 0.038(6) 0.045(6) -0.021(5) -0.011(5) 0.007(5) 
N4 0.035(5) 0.034(6) 0.043(6) -0.020(5) 0.001(5) -0.002(4) 
N5 0.027(4) 0.027(5) 0.023(4) -0.016(4) -0.005(4) 0.002(4) 
N6 0.026(5) 0.031(5) 0.031(5) -0.013(4) -0.001(4) -0.004(4) 
N7 0.031(5) 0.027(5) 0.016(4) -0.003(4) -0.003(4) 0.003(4) 
N8 0.028(5) 0.023(5) 0.026(5) -0.010(4) -0.009(4) 0.006(4) 
C1 0.038(6) 0.027(6) 0.012(4) -0.002(4) 0.001(4) 0.006(5) 
C2 0.031(6) 0.024(6) 0.027(5) -0.007(4) -0.010(5) -0.001(5) 
C3 0.035(6) 0.033(7) 0.035(6) -0.012(5) -0.013(5) 0.003(5) 
C4 0.022(5) 0.037(6) 0.027(5) -0.014(5) -0.005(4) 0.001(5) 
C5 0.035(6) 0.027(6) 0.027(6) -0.009(5) -0.007(5) 0.000(5) 
C6 0.030(6) 0.032(6) 0.030(6) -0.010(5) -0.011(5) 0.002(5) 
C7 0.031(6) 0.025(6) 0.025(5) -0.009(4) -0.003(4) 0.002(5) 
C8 0.030(6) 0.028(6) 0.019(5) -0.009(4) 0.001(4) 0.004(5) 
C9 0.034(6) 0.048(8) 0.037(7) -0.020(6) -0.010(5) 0.013(6) 
C10 0.042(7) 0.055(8) 0.035(7) -0.027(6) -0.008(6) 0.012(6) 
C11 0.039(7) 0.053(8) 0.044(7) -0.029(7) -0.005(6) 0.005(6) 
C12 0.036(6) 0.025(6) 0.040(7) -0.005(5) -0.019(5) 0.005(5) 
C13 0.046(7) 0.024(6) 0.033(6) -0.014(5) -0.013(5) 0.008(5) 
C14 0.042(7) 0.021(6) 0.043(7) -0.005(5) -0.011(6) 0.006(5) 
C15 0.054(8) 0.022(6) 0.029(6) 0.001(5) -0.014(5) 0.004(5) 
C16 0.078(10) 0.027(7) 0.039(7) -0.004(6) -0.005(7) -0.002(7) 
C17 0.088(12) 0.051(10) 0.043(8) -0.005(7) -0.013(8) 0.000(9) 
C18 0.082(11) 0.049(9) 0.025(6) 0.004(6) -0.013(7) -0.001(8) 
C19 0.051(8) 0.041(8) 0.029(6) 0.000(5) -0.011(6) 0.004(6) 
C20 0.043(7) 0.029(6) 0.024(5) -0.003(5) -0.008(5) 0.010(5) 
C21 0.039(6) 0.040(7) 0.020(5) -0.023(5) -0.013(5) 0.017(5) 
C22 0.029(6) 0.054(8) 0.022(5) -0.010(5) -0.008(5) 0.004(6) 
C23 0.038(7) 0.056(9) 0.031(6) -0.012(6) -0.017(5) 0.016(6) 
C24 0.045(8) 0.095(13) 0.022(6) -0.026(7) -0.010(6) 0.021(8) 
C25 0.044(7) 0.064(9) 0.034(7) -0.037(7) -0.018(6) 0.032(7) 
C26 0.033(6) 0.061(9) 0.035(7) -0.026(6) -0.010(5) 0.029(6) 
C27 0.051(8) 0.069(10) 0.050(8) -0.047(8) -0.025(7) 0.030(7) 
C28 0.039(7) 0.054(9) 0.070(9) -0.047(8) -0.013(7) 0.009(6) 
C29 0.064(10) 0.065(11) 0.090(12) -0.057(10) -0.042(9) 0.025(8) 
C30 0.047(9) 0.075(12) 0.152(18) -0.088(13) -0.036(11) 0.017(8) 
C31 0.036(8) 0.063(11) 0.136(16) -0.063(12) -0.035(9) 0.012(7) 
C32 0.036(7) 0.038(8) 0.092(11) -0.044(8) -0.006(7) 0.001(6) 
C33 0.022(6) 0.051(8) 0.061(8) -0.038(7) -0.004(6) 0.009(5) 
C34 0.038(7) 0.032(7) 0.047(7) -0.016(6) 0.003(6) 0.004(5) 
C35 0.041(7) 0.016(5) 0.036(6) -0.002(5) -0.004(5) 0.005(5) 
C36 0.041(7) 0.025(6) 0.046(7) -0.013(5) 0.003(6) -0.006(5) 
C37 0.037(7) 0.033(7) 0.048(8) -0.003(6) -0.007(6) 0.004(5) 
C38 0.042(7) 0.030(7) 0.041(7) -0.006(5) -0.014(6) 0.000(5) 
C39 0.047(7) 0.032(7) 0.025(6) 0.003(5) -0.004(5) 0.003(6) 
C40 0.035(6) 0.027(6) 0.022(5) -0.009(4) 0.005(5) -0.003(5) 
C41 0.028(6) 0.030(6) 0.034(6) -0.010(5) -0.013(5) 0.003(5) 
C42 0.044(7) 0.027(6) 0.036(6) -0.008(5) -0.011(5) 0.004(5) 
C43 0.038(7) 0.031(7) 0.044(7) -0.001(6) -0.014(6) 0.003(5) 
C44 0.043(7) 0.021(6) 0.042(7) -0.007(5) -0.009(6) 0.011(5) 
C45 0.028(6) 0.026(6) 0.035(6) -0.015(5) -0.006(5) 0.003(5) 
C46 0.026(5) 0.035(6) 0.030(6) -0.017(5) -0.006(5) 0.000(5) 
C47 0.033(6) 0.034(6) 0.025(5) -0.021(5) -0.006(5) 0.007(5) 
C48 0.025(5) 0.029(6) 0.023(5) -0.013(4) -0.007(4) 0.009(4) 
C49 0.029(6) 0.039(7) 0.026(5) -0.017(5) -0.006(5) 0.016(5) 
C50 0.041(7) 0.042(7) 0.027(6) -0.012(5) -0.004(5) 0.001(6) 
C51 0.048(8) 0.035(7) 0.029(6) -0.005(5) 0.006(6) 0.007(6) 
C52 0.039(7) 0.037(7) 0.031(6) -0.018(5) 0.004(5) 0.001(5) 
C53 0.035(6) 0.023(6) 0.023(5) -0.012(4) -0.002(5) 0.005(5) 
C54 0.029(6) 0.040(7) 0.032(6) -0.008(5) 0.003(5) 0.001(5) 
C55 0.031(6) 0.026(6) 0.043(7) -0.006(5) -0.016(5) -0.001(5) 
C56 0.030(6) 0.031(7) 0.048(7) 0.004(6) -0.004(5) 0.001(5) 
C57 0.033(7) 0.053(8) 0.038(7) -0.013(6) -0.010(6) -0.001(6) 
C58 0.050(7) 0.026(6) 0.038(6) -0.011(5) -0.021(6) -0.004(5) 
C59 0.035(6) 0.030(6) 0.029(6) -0.014(5) -0.008(5) 0.004(5) 
C60 0.040(7) 0.016(5) 0.039(6) -0.011(5) -0.009(5) 0.003(5) 
C61 0.032(6) 0.025(6) 0.027(5) -0.007(5) -0.003(5) -0.003(5) 
C62 0.051(8) 0.038(7) 0.037(7) -0.016(6) 0.001(6) -0.006(6) 
C63 0.053(8) 0.031(7) 0.055(8) -0.019(6) 0.019(7) -0.018(6) 
C64 0.067(10) 0.026(7) 0.067(10) -0.014(7) 0.009(8) -0.018(7) 
C65 0.047(8) 0.046(8) 0.044(8) -0.013(7) 0.004(6) -0.002(6) 
C66 0.030(6) 0.035(7) 0.032(6) -0.012(5) -0.006(5) -0.005(5) 
C67 0.026(6) 0.043(7) 0.036(6) -0.016(6) -0.014(5) 0.002(5) 
C68 0.031(6) 0.033(6) 0.018(5) -0.005(5) -0.007(4) 0.006(5) 
C69 0.028(6) 0.041(7) 0.043(7) -0.010(6) -0.012(5) 0.000(5) 
C70 0.025(6) 0.055(8) 0.034(6) -0.022(6) -0.002(5) 0.015(6) 
C71 0.044(7) 0.017(6) 0.045(7) 0.000(5) -0.012(6) 0.010(5) 
C72 0.036(6) 0.027(6) 0.031(6) -0.005(5) -0.007(5) 0.001(5) 
C73 0.028(6) 0.027(6) 0.025(5) -0.006(5) -0.002(4) 0.003(5) 
C74 0.031(6) 0.027(6) 0.022(5) -0.012(4) 0.003(4) 0.002(5) 
C75 0.020(5) 0.028(6) 0.032(6) -0.021(5) -0.004(4) -0.003(4) 
C76 0.034(6) 0.039(7) 0.039(7) -0.024(6) -0.005(5) -0.004(5) 
C77 0.031(7) 0.107(13) 0.045(8) -0.049(8) -0.011(6) -0.007(7) 
C78 0.030(7) 0.116(14) 0.062(9) -0.076(10) -0.020(6) 0.028(8) 
C79 0.036(6) 0.056(8) 0.028(6) -0.028(6) -0.008(5) 0.012(6) 
C80 0.036(6) 0.031(6) 0.024(5) -0.013(5) -0.011(5) -0.002(5) 
C81 0.13(2) 0.100(18) 0.15(2) -0.056(17) -0.068(18) 0.028(15) 
 
_geom_special_details 
; 
 All esds (except the esd in the dihedral angle between two l.s. planes) 
 are estimated using the full covariance matrix.  The cell esds are taken 
 into account individually in the estimation of esds in distances, angles 
 and torsion angles; correlations between esds in cell parameters are only 
 used when they are defined by crystal symmetry.  An approximate (isotropic) 
 treatment of cell esds is used for estimating esds involving l.s. planes. 
; 
 
loop_ 
 _geom_bond_atom_site_label_1 
 _geom_bond_atom_site_label_2 
 _geom_bond_distance 
 _geom_bond_site_symmetry_2 
 _geom_bond_publ_flag 
U1 O2 1.775(8) . ? 
U1 O1 1.776(8) . ? 
U1 O4 2.219(7) . ? 
U1 O3 2.402(7) . ? 
U1 O7 2.468(7) . ? 
U1 N1 2.506(9) . ? 
U1 N2 2.543(9) . ? 
U1 U2 3.8809(18) . ? 
U2 O6 1.764(8) . ? 
U2 O5 1.766(8) . ? 
U2 O8 2.240(7) . ? 
U2 O7 2.401(7) . ? 
U2 O3 2.482(7) . ? 
U2 N4 2.535(10) . ? 
U2 N3 2.541(10) . ? 
U3 O10 1.776(7) . ? 
U3 O9 1.778(7) . ? 
U3 O11 2.205(8) . ? 
U3 O12 2.396(7) . ? 
U3 O16 2.496(7) . ? 
U3 N6 2.534(9) . ? 
U3 N5 2.540(8) . ? 
U3 U4 3.8735(16) . ? 
U4 O14 1.774(7) . ? 
U4 O13 1.782(7) . ? 
U4 O15 2.220(8) . ? 
U4 O16 2.387(7) . ? 
U4 O12 2.445(6) . ? 
U4 N8 2.528(8) . ? 
U4 N7 2.531(9) . ? 
Cl1 C81 1.71(2) . ? 
Cl2 C81 1.73(2) . ? 
O3 C1 1.362(13) . ? 
O4 C20 1.319(13) . ? 
O7 C21 1.346(12) . ? 
O8 C40 1.326(13) . ? 
O11 C60 1.332(13) . ? 
O12 C41 1.347(13) . ? 
O15 C61 1.327(13) . ? 
O16 C80 1.366(12) . ? 
N1 C7 1.299(13) . ? 
N1 C8 1.438(12) . ? 
N2 C14 1.295(14) . ? 
N2 C13 1.424(14) . ? 
N3 C27 1.297(17) . ? 
N3 C28 1.436(17) . ? 
N4 C34 1.289(15) . ? 
N4 C33 1.427(16) . ? 
N5 C47 1.296(14) . ? 
N5 C48 1.435(13) . ? 
N6 C54 1.328(15) . ? 
N6 C53 1.418(13) . ? 
N7 C67 1.296(15) . ? 
N7 C68 1.424(14) . ? 
N8 C74 1.277(13) . ? 
N8 C73 1.423(13) . ? 
C1 C2 1.390(14) . ? 
C1 C6 1.418(15) . ? 
C2 C3 1.386(15) . ? 
C2 H2 0.9500 . ? 
C3 C4 1.410(15) . ? 
C3 H3 0.9500 . ? 
C4 C5 1.384(14) . ? 
C4 H4 0.9500 . ? 
C5 C6 1.406(15) . ? 
C5 H5 0.9500 . ? 
C6 C7 1.452(14) . ? 
C7 H7 0.9500 . ? 
C8 C9 1.375(15) . ? 
C8 C13 1.395(15) . ? 
C9 C10 1.376(16) . ? 
C9 H9 0.9500 . ? 
C10 C11 1.405(17) . ? 
C10 H10 0.9500 . ? 
C11 C12 1.370(16) . ? 
C11 H11 0.9500 . ? 
C12 C13 1.422(15) . ? 
C12 H12 0.9500 . ? 
C14 C15 1.443(16) . ? 
C14 H14 0.9500 . ? 
C15 C16 1.394(16) . ? 
C15 C20 1.430(17) . ? 
C16 C17 1.383(19) . ? 
C16 H16 0.9500 . ? 
C17 C18 1.37(2) . ? 
C17 H17 0.9500 . ? 
C18 C19 1.391(18) . ? 
C18 H18 0.9500 . ? 
C19 C20 1.389(16) . ? 
C19 H19 0.9500 . ? 
C21 C26 1.403(17) . ? 
C21 C22 1.398(17) . ? 
C22 C23 1.389(15) . ? 
C22 H22 0.9500 . ? 
C23 C24 1.38(2) . ? 
C23 H23 0.9500 . ? 
C24 C25 1.37(2) . ? 
C24 H24 0.9500 . ? 
C25 C26 1.429(17) . ? 
C25 H25 0.9500 . ? 
C26 C27 1.43(2) . ? 
C27 H27 0.9500 . ? 
C28 C33 1.376(19) . ? 
C28 C29 1.392(18) . ? 
C29 C30 1.41(2) . ? 
C29 H29 0.9500 . ? 
C30 C31 1.37(2) . ? 
C30 H30 0.9500 . ? 
C31 C32 1.377(19) . ? 
C31 H31 0.9500 . ? 
C32 C33 1.413(18) . ? 
C32 H32 0.9500 . ? 
C34 C35 1.439(18) . ? 
C34 H34 0.9500 . ? 
C35 C36 1.400(16) . ? 
C35 C40 1.431(16) . ? 
C36 C37 1.375(18) . ? 
C36 H36 0.9500 . ? 
C37 C38 1.377(18) . ? 
C37 H37 0.9500 . ? 
C38 C39 1.366(16) . ? 
C38 H38 0.9500 . ? 
C39 C40 1.403(17) . ? 
C39 H39 0.9500 . ? 
C41 C42 1.407(16) . ? 
C41 C46 1.435(15) . ? 
C42 C43 1.383(16) . ? 
C42 H42 0.9500 . ? 
C43 C44 1.408(17) . ? 
C43 H43 0.9500 . ? 
C44 C45 1.367(16) . ? 
C44 H44 0.9500 . ? 
C45 C46 1.394(15) . ? 
C45 H45 0.9500 . ? 
C46 C47 1.451(15) . ? 
C47 H47 0.9500 . ? 
C48 C49 1.382(14) . ? 
C48 C53 1.391(15) . ? 
C49 C50 1.407(16) . ? 
C49 H49 0.9500 . ? 
C50 C51 1.379(18) . ? 
C50 H50 0.9500 . ? 
C51 C52 1.387(17) . ? 
C51 H51 0.9500 . ? 
C52 C53 1.384(15) . ? 
C52 H52 0.9500 . ? 
C54 C55 1.435(17) . ? 
C54 H54 0.9500 . ? 
C55 C56 1.418(16) . ? 
C55 C60 1.427(16) . ? 
C56 C57 1.389(18) . ? 
C56 H56 0.9500 . ? 
C57 C58 1.375(17) . ? 
C57 H57 0.9500 . ? 
C58 C59 1.366(16) . ? 
C58 H58 0.9500 . ? 
C59 C60 1.400(15) . ? 
C59 H59 0.9500 . ? 
C61 C66 1.411(15) . ? 
C61 C62 1.410(16) . ? 
C62 C63 1.381(17) . ? 
C62 H62 0.9500 . ? 
C63 C64 1.400(18) . ? 
C63 H63 0.9500 . ? 
C64 C65 1.379(18) . ? 
C64 H64 0.9500 . ? 
C65 C66 1.420(17) . ? 
C65 H65 0.9500 . ? 
C66 C67 1.435(16) . ? 
C67 H67 0.9500 . ? 
C68 C69 1.391(15) . ? 
C68 C73 1.391(16) . ? 
C69 C70 1.381(17) . ? 
C69 H69 0.9500 . ? 
C70 C71 1.383(18) . ? 
C70 H70 0.9500 . ? 
C71 C72 1.389(16) . ? 
C71 H71 0.9500 . ? 
C72 C73 1.394(15) . ? 
C72 H72 0.9500 . ? 
C74 C75 1.432(14) . ? 
C74 H74 0.9500 . ? 
C75 C76 1.417(14) . ? 
C75 C80 1.435(14) . ? 
C76 C77 1.377(16) . ? 
C76 H76 0.9500 . ? 
C77 C78 1.381(17) . ? 
C77 H77 0.9500 . ? 
C78 C79 1.370(15) . ? 
C78 H78 0.9500 . ? 
C79 C80 1.380(15) . ? 
C79 H79 0.9500 . ? 
C81 H81A 0.9900 . ? 
C81 H81B 0.9900 . ? 
 
loop_ 
 _geom_angle_atom_site_label_1 
 _geom_angle_atom_site_label_2 
 _geom_angle_atom_site_label_3 
 _geom_angle 
 _geom_angle_site_symmetry_1 
 _geom_angle_site_symmetry_3 
 _geom_angle_publ_flag 
O2 U1 O1 175.1(3) . . ? 
O2 U1 O4 92.1(3) . . ? 
O1 U1 O4 90.1(3) . . ? 
O2 U1 O3 93.6(3) . . ? 
O1 U1 O3 86.4(3) . . ? 
O4 U1 O3 152.0(3) . . ? 
O2 U1 O7 89.2(3) . . ? 
O1 U1 O7 95.5(3) . . ? 
O4 U1 O7 83.0(3) . . ? 
O3 U1 O7 69.6(2) . . ? 
O2 U1 N1 89.6(3) . . ? 
O1 U1 N1 85.7(3) . . ? 
O4 U1 N1 134.7(3) . . ? 
O3 U1 N1 72.8(3) . . ? 
O7 U1 N1 142.3(3) . . ? 
O2 U1 N2 89.1(3) . . ? 
O1 U1 N2 87.5(3) . . ? 
O4 U1 N2 70.9(3) . . ? 
O3 U1 N2 136.6(3) . . ? 
O7 U1 N2 153.8(3) . . ? 
N1 U1 N2 63.9(3) . . ? 
O2 U1 U2 77.2(2) . . ? 
O1 U1 U2 105.6(2) . . ? 
O4 U1 U2 117.7(2) . . ? 
O3 U1 U2 38.11(17) . . ? 
O7 U1 U2 36.56(17) . . ? 
N1 U1 U2 106.9(2) . . ? 
N2 U1 U2 163.8(2) . . ? 
O6 U2 O5 175.7(3) . . ? 
O6 U2 O8 89.9(3) . . ? 
O5 U2 O8 91.8(3) . . ? 
O6 U2 O7 91.9(3) . . ? 
O5 U2 O7 88.5(3) . . ? 
O8 U2 O7 152.4(3) . . ? 
O6 U2 O3 90.4(3) . . ? 
O5 U2 O3 93.7(3) . . ? 
O8 U2 O3 83.1(3) . . ? 
O7 U2 O3 69.4(2) . . ? 
O6 U2 N4 93.3(3) . . ? 
O5 U2 N4 83.5(3) . . ? 
O8 U2 N4 70.9(3) . . ? 
O7 U2 N4 136.3(3) . . ? 
O3 U2 N4 153.7(3) . . ? 
O6 U2 N3 88.3(3) . . ? 
O5 U2 N3 87.7(3) . . ? 
O8 U2 N3 134.5(3) . . ? 
O7 U2 N3 73.0(3) . . ? 
O3 U2 N3 142.3(3) . . ? 
N4 U2 N3 63.8(3) . . ? 
O6 U2 U1 77.0(2) . . ? 
O5 U2 U1 105.7(3) . . ? 
O8 U2 U1 116.7(2) . . ? 
O7 U2 U1 37.74(15) . . ? 
O3 U2 U1 36.67(15) . . ? 
N4 U2 U1 167.2(2) . . ? 
N3 U2 U1 107.1(2) . . ? 
O10 U3 O9 175.8(3) . . ? 
O10 U3 O11 93.5(3) . . ? 
O9 U3 O11 87.9(3) . . ? 
O10 U3 O12 94.6(3) . . ? 
O9 U3 O12 85.7(3) . . ? 
O11 U3 O12 156.2(2) . . ? 
O10 U3 O16 86.8(3) . . ? 
O9 U3 O16 97.1(3) . . ? 
O11 U3 O16 89.0(3) . . ? 
O12 U3 O16 69.2(2) . . ? 
O10 U3 N6 88.9(3) . . ? 
O9 U3 N6 87.9(3) . . ? 
O11 U3 N6 70.1(3) . . ? 
O12 U3 N6 132.3(3) . . ? 
O16 U3 N6 158.4(3) . . ? 
O10 U3 N5 86.8(3) . . ? 
O9 U3 N5 89.3(3) . . ? 
O11 U3 N5 132.2(3) . . ? 
O12 U3 N5 70.6(3) . . ? 
O16 U3 N5 138.6(3) . . ? 
N6 U3 N5 62.1(3) . . ? 
O10 U3 U4 77.1(2) . . ? 
O9 U3 U4 105.3(2) . . ? 
O11 U3 U4 124.34(19) . . ? 
O12 U3 U4 37.30(15) . . ? 
O16 U3 U4 36.54(17) . . ? 
N6 U3 U4 160.0(2) . . ? 
N5 U3 U4 102.3(2) . . ? 
O14 U4 O13 176.2(3) . . ? 
O14 U4 O15 92.3(3) . . ? 
O13 U4 O15 89.5(3) . . ? 
O14 U4 O16 91.4(3) . . ? 
O13 U4 O16 88.5(3) . . ? 
O15 U4 O16 152.1(3) . . ? 
O14 U4 O12 87.7(3) . . ? 
O13 U4 O12 95.8(3) . . ? 
O15 U4 O12 82.4(3) . . ? 
O16 U4 O12 70.2(2) . . ? 
O14 U4 N8 88.8(3) . . ? 
O13 U4 N8 87.6(3) . . ? 
O15 U4 N8 134.5(3) . . ? 
O16 U4 N8 73.1(3) . . ? 
O12 U4 N8 143.0(3) . . ? 
O14 U4 N7 90.4(3) . . ? 
O13 U4 N7 87.1(3) . . ? 
O15 U4 N7 70.5(3) . . ? 
O16 U4 N7 137.1(3) . . ? 
O12 U4 N7 152.7(3) . . ? 
N8 U4 N7 64.0(3) . . ? 
O14 U4 U3 75.4(2) . . ? 
O13 U4 U3 106.7(2) . . ? 
O15 U4 U3 116.7(2) . . ? 
O16 U4 U3 38.49(16) . . ? 
O12 U4 U3 36.43(17) . . ? 
N8 U4 U3 107.5(2) . . ? 
N7 U4 U3 163.96(19) . . ? 
C1 O3 U1 124.2(6) . . ? 
C1 O3 U2 125.3(6) . . ? 
U1 O3 U2 105.2(3) . . ? 
C20 O4 U1 136.3(7) . . ? 
C21 O7 U2 126.9(6) . . ? 
C21 O7 U1 124.6(7) . . ? 
U2 O7 U1 105.7(2) . . ? 
C40 O8 U2 127.1(6) . . ? 
C60 O11 U3 130.4(6) . . ? 
C41 O12 U3 123.8(6) . . ? 
C41 O12 U4 125.9(6) . . ? 
U3 O12 U4 106.3(2) . . ? 
C61 O15 U4 130.2(7) . . ? 
C80 O16 U4 125.3(6) . . ? 
C80 O16 U3 125.2(6) . . ? 
U4 O16 U3 105.0(3) . . ? 
C7 N1 C8 117.0(9) . . ? 
C7 N1 U1 124.3(7) . . ? 
C8 N1 U1 117.6(6) . . ? 
C14 N2 C13 118.2(10) . . ? 
C14 N2 U1 125.7(8) . . ? 
C13 N2 U1 115.7(7) . . ? 
C27 N3 C28 118.4(12) . . ? 
C27 N3 U2 126.0(9) . . ? 
C28 N3 U2 115.3(8) . . ? 
C34 N4 C33 119.5(11) . . ? 
C34 N4 U2 123.4(9) . . ? 
C33 N4 U2 116.7(8) . . ? 
C47 N5 C48 117.8(8) . . ? 
C47 N5 U3 127.4(7) . . ? 
C48 N5 U3 114.8(6) . . ? 
C54 N6 C53 120.0(9) . . ? 
C54 N6 U3 125.5(7) . . ? 
C53 N6 U3 114.5(7) . . ? 
C67 N7 C68 118.2(9) . . ? 
C67 N7 U4 124.5(7) . . ? 
C68 N7 U4 116.4(7) . . ? 
C74 N8 C73 118.9(9) . . ? 
C74 N8 U4 124.2(7) . . ? 
C73 N8 U4 116.0(7) . . ? 
O3 C1 C2 120.6(10) . . ? 
O3 C1 C6 120.3(9) . . ? 
C2 C1 C6 119.0(10) . . ? 
C1 C2 C3 120.8(11) . . ? 
C1 C2 H2 119.6 . . ? 
C3 C2 H2 119.6 . . ? 
C2 C3 C4 121.4(10) . . ? 
C2 C3 H3 119.3 . . ? 
C4 C3 H3 119.3 . . ? 
C5 C4 C3 117.7(10) . . ? 
C5 C4 H4 121.2 . . ? 
C3 C4 H4 121.2 . . ? 
C4 C5 C6 122.1(11) . . ? 
C4 C5 H5 119.0 . . ? 
C6 C5 H5 119.0 . . ? 
C5 C6 C1 119.1(10) . . ? 
C5 C6 C7 114.4(10) . . ? 
C1 C6 C7 126.5(10) . . ? 
N1 C7 C6 127.1(10) . . ? 
N1 C7 H7 116.5 . . ? 
C6 C7 H7 116.5 . . ? 
C9 C8 C13 121.9(10) . . ? 
C9 C8 N1 122.9(10) . . ? 
C13 C8 N1 115.2(9) . . ? 
C8 C9 C10 119.5(11) . . ? 
C8 C9 H9 120.3 . . ? 
C10 C9 H9 120.3 . . ? 
C9 C10 C11 120.7(11) . . ? 
C9 C10 H10 119.7 . . ? 
C11 C10 H10 119.7 . . ? 
C12 C11 C10 119.6(11) . . ? 
C12 C11 H11 120.2 . . ? 
C10 C11 H11 120.2 . . ? 
C11 C12 C13 120.6(10) . . ? 
C11 C12 H12 119.7 . . ? 
C13 C12 H12 119.7 . . ? 
C8 C13 C12 117.7(10) . . ? 
C8 C13 N2 117.8(9) . . ? 
C12 C13 N2 124.5(10) . . ? 
N2 C14 C15 127.3(11) . . ? 
N2 C14 H14 116.4 . . ? 
C15 C14 H14 116.4 . . ? 
C16 C15 C20 120.3(11) . . ? 
C16 C15 C14 117.0(11) . . ? 
C20 C15 C14 122.6(10) . . ? 
C15 C16 C17 119.8(14) . . ? 
C15 C16 H16 120.1 . . ? 
C17 C16 H16 120.1 . . ? 
C18 C17 C16 120.5(14) . . ? 
C18 C17 H17 119.7 . . ? 
C16 C17 H17 119.7 . . ? 
C17 C18 C19 120.5(13) . . ? 
C17 C18 H18 119.7 . . ? 
C19 C18 H18 119.7 . . ? 
C20 C19 C18 121.0(13) . . ? 
C20 C19 H19 119.5 . . ? 
C18 C19 H19 119.5 . . ? 
O4 C20 C19 121.4(11) . . ? 
O4 C20 C15 120.8(10) . . ? 
C19 C20 C15 117.8(11) . . ? 
O7 C21 C26 121.8(12) . . ? 
O7 C21 C22 119.7(9) . . ? 
C26 C21 C22 118.4(10) . . ? 
C21 C22 C23 121.8(12) . . ? 
C21 C22 H22 119.1 . . ? 
C23 C22 H22 119.1 . . ? 
C24 C23 C22 119.9(14) . . ? 
C24 C23 H23 120.0 . . ? 
C22 C23 H23 120.0 . . ? 
C25 C24 C23 119.6(12) . . ? 
C25 C24 H24 120.2 . . ? 
C23 C24 H24 120.2 . . ? 
C24 C25 C26 121.7(12) . . ? 
C24 C25 H25 119.1 . . ? 
C26 C25 H25 119.1 . . ? 
C21 C26 C25 118.3(14) . . ? 
C21 C26 C27 126.5(11) . . ? 
C25 C26 C27 115.2(12) . . ? 
N3 C27 C26 128.1(12) . . ? 
N3 C27 H27 116.0 . . ? 
C26 C27 H27 116.0 . . ? 
C33 C28 C29 119.6(14) . . ? 
C33 C28 N3 117.3(12) . . ? 
C29 C28 N3 123.1(14) . . ? 
C28 C29 C30 119.4(16) . . ? 
C28 C29 H29 120.3 . . ? 
C30 C29 H29 120.3 . . ? 
C31 C30 C29 120.8(15) . . ? 
C31 C30 H30 119.6 . . ? 
C29 C30 H30 119.6 . . ? 
C32 C31 C30 119.8(16) . . ? 
C32 C31 H31 120.1 . . ? 
C30 C31 H31 120.1 . . ? 
C31 C32 C33 119.8(15) . . ? 
C31 C32 H32 120.1 . . ? 
C33 C32 H32 120.1 . . ? 
C28 C33 N4 117.0(12) . . ? 
C28 C33 C32 120.5(13) . . ? 
N4 C33 C32 122.3(13) . . ? 
N4 C34 C35 126.9(12) . . ? 
N4 C34 H34 116.5 . . ? 
C35 C34 H34 116.5 . . ? 
C36 C35 C40 118.6(12) . . ? 
C36 C35 C34 119.7(11) . . ? 
C40 C35 C34 121.7(10) . . ? 
C37 C36 C35 122.4(12) . . ? 
C37 C36 H36 118.8 . . ? 
C35 C36 H36 118.8 . . ? 
C38 C37 C36 118.4(11) . . ? 
C38 C37 H37 120.8 . . ? 
C36 C37 H37 120.8 . . ? 
C39 C38 C37 121.5(12) . . ? 
C39 C38 H38 119.2 . . ? 
C37 C38 H38 119.2 . . ? 
C38 C39 C40 121.6(12) . . ? 
C38 C39 H39 119.2 . . ? 
C40 C39 H39 119.2 . . ? 
O8 C40 C39 121.3(10) . . ? 
O8 C40 C35 121.3(10) . . ? 
C39 C40 C35 117.3(10) . . ? 
O12 C41 C42 121.3(10) . . ? 
O12 C41 C46 120.9(10) . . ? 
C42 C41 C46 117.7(10) . . ? 
C43 C42 C41 120.7(11) . . ? 
C43 C42 H42 119.6 . . ? 
C41 C42 H42 119.6 . . ? 
C42 C43 C44 121.5(11) . . ? 
C42 C43 H43 119.3 . . ? 
C44 C43 H43 119.3 . . ? 
C45 C44 C43 118.0(11) . . ? 
C45 C44 H44 121.0 . . ? 
C43 C44 H44 121.0 . . ? 
C44 C45 C46 122.8(10) . . ? 
C44 C45 H45 118.6 . . ? 
C46 C45 H45 118.6 . . ? 
C45 C46 C41 119.3(10) . . ? 
C45 C46 C47 117.6(10) . . ? 
C41 C46 C47 123.1(10) . . ? 
N5 C47 C46 126.8(9) . . ? 
N5 C47 H47 116.6 . . ? 
C46 C47 H47 116.6 . . ? 
C49 C48 C53 120.7(10) . . ? 
C49 C48 N5 124.7(10) . . ? 
C53 C48 N5 114.6(9) . . ? 
C48 C49 C50 118.3(12) . . ? 
C48 C49 H49 120.8 . . ? 
C50 C49 H49 120.8 . . ? 
C51 C50 C49 121.9(12) . . ? 
C51 C50 H50 119.1 . . ? 
C49 C50 H50 119.1 . . ? 
C50 C51 C52 118.2(11) . . ? 
C50 C51 H51 120.9 . . ? 
C52 C51 H51 120.9 . . ? 
C53 C52 C51 121.4(12) . . ? 
C53 C52 H52 119.3 . . ? 
C51 C52 H52 119.3 . . ? 
C48 C53 C52 119.5(10) . . ? 
C48 C53 N6 116.3(9) . . ? 
C52 C53 N6 124.1(11) . . ? 
N6 C54 C55 123.2(10) . . ? 
N6 C54 H54 118.4 . . ? 
C55 C54 H54 118.4 . . ? 
C56 C55 C60 117.5(11) . . ? 
C56 C55 C54 118.3(11) . . ? 
C60 C55 C54 123.9(10) . . ? 
C57 C56 C55 121.7(12) . . ? 
C57 C56 H56 119.2 . . ? 
C55 C56 H56 119.2 . . ? 
C58 C57 C56 118.7(12) . . ? 
C58 C57 H57 120.6 . . ? 
C56 C57 H57 120.6 . . ? 
C59 C58 C57 121.8(11) . . ? 
C59 C58 H58 119.1 . . ? 
C57 C58 H58 119.1 . . ? 
C58 C59 C60 120.9(11) . . ? 
C58 C59 H59 119.6 . . ? 
C60 C59 H59 119.6 . . ? 
O11 C60 C59 121.7(10) . . ? 
O11 C60 C55 119.1(10) . . ? 
C59 C60 C55 119.1(11) . . ? 
O15 C61 C66 120.4(10) . . ? 
O15 C61 C62 119.6(10) . . ? 
C66 C61 C62 120.0(11) . . ? 
C63 C62 C61 120.1(12) . . ? 
C63 C62 H62 120.0 . . ? 
C61 C62 H62 120.0 . . ? 
C62 C63 C64 121.0(12) . . ? 
C62 C63 H63 119.5 . . ? 
C64 C63 H63 119.5 . . ? 
C65 C64 C63 119.2(13) . . ? 
C65 C64 H64 120.4 . . ? 
C63 C64 H64 120.4 . . ? 
C64 C65 C66 121.5(12) . . ? 
C64 C65 H65 119.2 . . ? 
C66 C65 H65 119.2 . . ? 
C61 C66 C65 118.1(11) . . ? 
C61 C66 C67 123.5(11) . . ? 
C65 C66 C67 118.2(11) . . ? 
N7 C67 C66 125.4(11) . . ? 
N7 C67 H67 117.3 . . ? 
C66 C67 H67 117.3 . . ? 
C69 C68 C73 120.7(11) . . ? 
C69 C68 N7 123.2(11) . . ? 
C73 C68 N7 116.1(9) . . ? 
C68 C69 C70 119.7(12) . . ? 
C68 C69 H69 120.1 . . ? 
C70 C69 H69 120.1 . . ? 
C71 C70 C69 119.8(10) . . ? 
C71 C70 H70 120.1 . . ? 
C69 C70 H70 120.1 . . ? 
C70 C71 C72 121.0(11) . . ? 
C70 C71 H71 119.5 . . ? 
C72 C71 H71 119.5 . . ? 
C73 C72 C71 119.4(11) . . ? 
C73 C72 H72 120.3 . . ? 
C71 C72 H72 120.3 . . ? 
C72 C73 C68 119.3(10) . . ? 
C72 C73 N8 122.9(10) . . ? 
C68 C73 N8 117.7(9) . . ? 
N8 C74 C75 128.0(9) . . ? 
N8 C74 H74 116.0 . . ? 
C75 C74 H74 116.0 . . ? 
C76 C75 C80 117.2(9) . . ? 
C76 C75 C74 115.3(9) . . ? 
C80 C75 C74 127.5(9) . . ? 
C77 C76 C75 121.8(11) . . ? 
C77 C76 H76 119.1 . . ? 
C75 C76 H76 119.1 . . ? 
C76 C77 C78 118.3(11) . . ? 
C76 C77 H77 120.9 . . ? 
C78 C77 H77 120.9 . . ? 
C79 C78 C77 122.9(11) . . ? 
C79 C78 H78 118.6 . . ? 
C77 C78 H78 118.6 . . ? 
C80 C79 C78 119.7(10) . . ? 
C80 C79 H79 120.2 . . ? 
C78 C79 H79 120.2 . . ? 
O16 C80 C79 120.9(10) . . ? 
O16 C80 C75 119.0(9) . . ? 
C79 C80 C75 120.1(9) . . ? 
Cl1 C81 Cl2 114.4(14) . . ? 
Cl1 C81 H81A 108.7 . . ? 
Cl2 C81 H81A 108.7 . . ? 
Cl1 C81 H81B 108.7 . . ? 
Cl2 C81 H81B 108.7 . . ? 
H81A C81 H81B 107.6 . . ? 
 
_diffrn_measured_fraction_theta_max    0.975 
_diffrn_reflns_theta_full              27.48 
_diffrn_measured_fraction_theta_full   0.975 
_refine_diff_density_max    2.490 
_refine_diff_density_min   -2.984 
_refine_diff_density_rms    0.239 
